# Supplementary material for: Antibacterial activity of ethoxzolamide against Helicobacter pylori strains SS1 and 26695
Source: PubMed Central journal article supplement (PMC7158114; doi:10.1186/s13099-020-00358-5), 2020-04-15
Supplement: 13099_2020_358_MOESM1_ESM.pdf [file 13099_2020_358_MOESM1_ESM.pdf]

**Table S1.** Nucleotide changes in the *H. pylori* SS1 mutant resistant to EZA.

| Position <sup>a</sup>                                      | Type         | Reference | Allele | Locus tag     | Amino acid substitution | Gene product                                      |
|------------------------------------------------------------|--------------|-----------|--------|---------------|-------------------------|---------------------------------------------------|
| <b><i>Helicobacter pylori</i> SS1 EZA resistant mutant</b> |              |           |        |               |                         |                                                   |
| <b>Gene class: transporter</b>                             |              |           |        |               |                         |                                                   |
| 309374                                                     | Deletion     | G         | -      | HPYLSS1_00289 | Ala250fs <sup>b</sup>   | dipeptide transport system permease protein DppC  |
| 1013480                                                    | Deletion     | A         | -      | HPYLSS1_00787 | Lys212fs                | flagellar protein export apparatus component FliO |
| <b>Gene class: regulation</b>                              |              |           |        |               |                         |                                                   |
| 592353                                                     | Substitution | T         | C      | HPYLSS1_00577 | Val464Ala               | ribonuclease Y                                    |
| <b>Gene class: translation</b>                             |              |           |        |               |                         |                                                   |
| 1169965                                                    | Substitution | C         | A      | HPYLSS1_01099 | Gly311Val               | valyl-tRNA synthetase                             |
| <b>Gene class: cell wall synthesis</b>                     |              |           |        |               |                         |                                                   |
| 1235634                                                    | Substitution | G         | T      | HPYLSS1_01157 | Ala302Ser               | O-antigen flippase Wzk                            |
| 1415084                                                    | Deletion     | GA        | -      | HPYLSS1_01343 | Glu263fs                | phosphoethanolamine transferase                   |
| <b>Gene class: biological function unknown</b>             |              |           |        |               |                         |                                                   |
| 1004529                                                    | Insertion    | -         | TG     | HPYLSS1_00797 | His2fs                  | haloacid dehalogenase-like hydrolase              |
| 1030442                                                    | Substitution | G         | T      | HPYLSS1_00769 | Gly45Trp                | hypothetical protein                              |
| 1306813                                                    | Substitution | A         | C      | HPYLSS1_01230 | -                       | hypothetical protein                              |

<sup>a</sup>Position of nucleotides are specified with reference to the published *H. pylori* SS1 genome (GenBank ID: CP009259)

<sup>b</sup>fs, frameshift mutation
