# Supplementary material for: Antibacterial activity of ethoxzolamide against Helicobacter pylori strains SS1 and 26695
Source: PubMed Central journal article supplement (PMC7158114; doi:10.1186/s13099-020-00358-5), 2020-04-15
Supplement: 13099_2020_358_MOESM2_ESM.pdf [file 13099_2020_358_MOESM2_ESM.pdf]

**Table S2.** Nucleotide changes in the *H. pylori* 26695 mutant resistant to EZA.

| Position <sup>a</sup>                                        | Type         | Reference | Allele | Locus tag | Amino acid substitution | Gene product                            |
|--------------------------------------------------------------|--------------|-----------|--------|-----------|-------------------------|-----------------------------------------|
| <b><i>Helicobacter pylori</i> 26695 EZA resistant mutant</b> |              |           |        |           |                         |                                         |
| <b>Gene class: membrane proteins and transporters</b>        |              |           |        |           |                         |                                         |
| 57000                                                        | Substitution | C         | A      | HP_0055   | Val239Phe               | sodium/proline symporter                |
| 524749                                                       | Insertion    | -         | T      | HP_0498   | Ser223fs <sup>b</sup>   | sodium-dependent transporter            |
| 646044                                                       | Substitution | C         | T      | HP_0607   | Ala862Val               | efflux RND transporter permease subunit |
| 1248093                                                      | Substitution | A         | C      | HP_1180   | Leu360Trp               | nucleoside transporter                  |
| <b>Gene class: translation</b>                               |              |           |        |           |                         |                                         |
| 1281494                                                      | Substitution | G         | A      | HP_1205   | Pro129Ser               | translation elongation factor Tu        |
| <b>Gene class: transcription</b>                             |              |           |        |           |                         |                                         |
| 1367889                                                      | Substitution | C         | T      | HP_1293   | Glu290Lys               | RNA polymerase subunit $\alpha$         |
| 94302                                                        | Substitution | C         | A      | HP_0088   | Glu222Asp               | RNA polymerase $\sigma$ -factor         |
| <b>Gene class: ATP synthase</b>                              |              |           |        |           |                         |                                         |
| 1197822                                                      | Substitution | C         | T      | HP_1134   | -                       | ATP synthase subunit $\alpha$           |
| 1197875                                                      | Substitution | C         | T      |           | Gly88Ser                |                                         |
| 1198143                                                      | Deletion     | TC        | -      | -         | -                       | ribosome-binding site for HP_1134       |
| 1198189                                                      | Substitution | T         | C      | HP_1135   | Glu171Lys               | ATP synthase subunit $\delta$           |
| <b>Gene class: cell wall synthesis</b>                       |              |           |        |           |                         |                                         |
| 1296698                                                      | Substitution | T         | C      | HP_1221   | Asn131Asp               | UPP pyrophosphate synthase              |
| <b>Gene class: metabolic</b>                                 |              |           |        |           |                         |                                         |
| 749176                                                       | Insertion    | -         | A      | HP_0696   | Lys408fs                | acetone carboxylase subunit $\alpha$    |
| 1548534                                                      | Substitution | A         | C      | HP_1476   | Gly60Ala                | flavin prenyltransferase UbiX           |
| 1548564                                                      | Substitution | C         | T      |           | Ala129Thr               |                                         |
| 1548769                                                      | Substitution | AC        | CG     |           | Ser139Ala               |                                         |
| <b>Gene class: biological function unknown</b>               |              |           |        |           |                         |                                         |
| 597699                                                       | Deletion     | TC        | -      | HP_0565   | Glu81fs                 | hypothetical protein                    |
| 835376                                                       | Substitution | T         | C      | HP_0781   | Ala92Val                | hypothetical protein                    |
| 835407                                                       | Substitution | A         | C      |           | Asp102Glu               |                                         |
| 835710                                                       | Substitution | G         | A      |           | Thr201Ala               |                                         |

<sup>a</sup>Nucleotide positions are indicated with reference to the published *H. pylori* 26695 genome (GenBank ID: AE000511).

<sup>b</sup>fs, frameshift mutation
